# Supplementary material for: Intra-individual variation in performance on novel variants of similar tasks influences single factor explanations of general cognitive processes
Source: R Soc Open Sci. 2018 Jul 11;5(7):171919. doi: 10.1098/rsos.171919 (PMC6083680; doi:10.1098/rsos.171919)
Supplement: Dataset [file rsos171919supp1.xlsx]

## Sheet: Sheet1
BIRD	Y0.8logGreenBlueAcquiistion	Y0.8logGreenBlueReversal	Y0.8logYellowPinkAcquisition	Y0.8logYellowPinkReversal	Y0.8logPositionalLearning	YPositionalMemory	YMotor1Paper	Motor2RoboWorm	DetourReach	First10CorrectGreenBlueAcquiistion	Final10CorrectGreenBlueAcquiistion	First10CorrectGreenBlueReversal	Final10CorrectGreenBlueReversal	First10CorrectYellowPinkAcquisition	Final10CorrectYellowPinkAcquisition	First10CorrectYellowPinkReversal	Final10CorrectYellowPinkReversal	First10CorrectPositionalLearning	Final10CorrectPositionalLearning	FirstTrialErrorsPositionalMemory	FinalTrialErrorsPositionalMemory	First10Motor1Paper	Final10Motor1Paper	Sex	BodyCondition
160	-1.6	-1.76	-1.6	-1.76	-1.59	-1.31	0.71	-4	-8	6	9	2	6	5	9	3	7	0	4	7	3	2	5	m	0.2
218	-1.99	-2.22	-2.07	-1.84	-1.23	-1.47	0.6	-2	-2	5	7	6	7	7	8	4	7	5	9	6	4	2	5	m	0.21
251	-1.76	-1.85	-1.58	-1.7	-0.31	-1.69	0.45	-3	-3	4	7	3	5	4	8	1	7	9	9	4	0	2	5	m	0.2
256	-1.94	-1.71	-1.63	-1.96	-1.26	-1.46	1.53	-1	-2	6	7	4	7	6	9	3	6	7	9	4	3	2	2	m	0.21
272	-1.5	-1.89	-2.06	-1.62	-1.5	-1.05	0.77	-1	0	6	9	0	3	6	7	3	7	8	8	5	1	0	5	m	0.19
295	-1.53	-1.77	-1.55	-2.71	-1.03	-1.48	1.88	0	-25	5	9	4	8	7	7	4	5	8	9	2	3	2	1	f	0.21
296	-1.6	-1.81	-1.61	-1.61	-1.16	-1.38	1.08	0	-17	4	9	3	6	3	6	5	9	8	10	1	4	2	4	m	0.23
298	-1.77	-2.25	-1.89	-2.05	-0.93	-1.18	0.43	-2	0	4	7	3	4	6	7	3	6	6	10	4	1	2	4	m	0.21
313	-1.56	-1.98	-1.66	-1.79	-1.14	-1.31	0.83	0	-12	3	9	1	5	6	9	5	7	7	9	4	1	3	5	m	0.2
335	-1.42	-2.43	-1.91	-2.52	-1.44	-1.85	0.43	-29	-10	6	10	2	2	2	5	5	7	0	6	4	5	2	5	m	0.18
341	-2.65	-1.89	-1.79	-2.57	-1.16	-1.38	0.57	-3	-10	6	6	4	6	5	7	5	5	7	9	7	7	2	5	m	0.17
354	-1.8	-1.85	-1.87	-3.65	-1.22	-1.18	0.74	-1	-49	3	6	2	6	4	6	5	5	3	9	6	4	2	3	m	0.2
356	-1.29	-1.9	-1.61	-1.73	-1.58	-1.54	0.78	-4	-4	7	9	1	4	7	8	1	8	4	8	6	3	2	4	m	0.18
357	-1.97	-1.81	-1.45	-2.17	-1.34	-1.61	0.66	-16	-14	6	8	0	2	4	10	2	5	5	9	5	6	2	5	f	0.24
364	-1.71	-1.98	-2.02	-1.92	-1.49	-1.34	1.3	-3	-35	6	10	2	5	5	6	0	4	0	5	6	5	0	2	f	0.22
366	-1.58	-1.98	-1.46	-1.82	-1.37	-1.16	0.82	-3	-1	4	7	5	7	4	8	2	6	4	7	6	5	2	5	m	0.19
368	-1.74	-1.86	-1.7	-2.34	-1.25	-1.41	1.11	-1	-16	2	7	0	3	4	8	3	4	0	9	4	5	0	2	f	0.21
372	-1.64	-1.88	-1.41	-2.1	-1.19	-1.4	1.51	0	-106	6	8	1	4	5	10	3	4	8	9	6	5	0	2	m	0.2
373	-1.44	-1.9	-2.29	-2.23	-1.64	-1.2	1.27	0	-22	2	10	2	5	5	5	4	5	6	7	4	3	2	4	f	0.23
386	-1.74	-1.75	-1.48	-1.62	-1.41	-1.36	0.94	-2	-22	7	7	0	6	3	9	1	8	3	7	6	5	0	2	m	0.18
398	-1.43	-1.84	-2.27	-1.7	-1.38	-1.26	1.41	0	-29	4	10	1	5	5	6	3	8	4	8	4	4	0	2	x	x
425	-1.7	-1.89	-1.77	-1.7	-1.03	-1.27	1.38	-17	-4	5	8	4	6	6	8	4	8	6	10	1	1	1	2	f	0.23
426	-1.49	-2.04	-1.59	-1.93	-1.51	-1.16	0.52	-3	-24	2	8	1	3	6	9	1	5	3	7	2	3	3	5	f	0.19
428	-1.55	-1.73	-1.72	-2.12	-1.51	-1.43	1.1	-1	-24	4	7	2	8	3	8	1	3	4	7	3	3	0	2	m	0.19
433	-2.05	-3.1	-1.94	-1.89	-1.4	-1.61	0.49	-1	-5	4	5	3	4	6	7	5	7	7	9	7	4	3	5	f	0.2
435	-1.72	-1.86	-1.37	-1.85	-0.74	-2.2	0.56	0	0	6	7	1	4	6	9	1	5	7	10	1	2	2	5	m	0.17
441	-2.06	-2.82	-1.69	-2.59	-1.18	-1.32	1.11	-21	0	4	5	2	4	6	7	4	4	6	10	6	0	0	2	f	0.19
443	-1.66	-1.75	-2.04	-1.71	-1.39	-2.59	1.06	-2	-7	1	9	4	8	5	6	3	8	5	9	3	0	2	2	f	0.22
446	-1.94	-1.98	-1.71	-1.91	-1.3	-1.64	1.14	-3	-7	7	8	1	2	6	8	4	6	2	8	6	6	1	2	x	x
449	-1.67	-1.63	-1.77	-1.82	-1.57	-1.17	1.26	0	-45	4	8	2	8	7	8	3	7	2	6	2	1	1	2	m	0.17
471	-1.63	-2.09	-1.75	-1.77	-1.75	-1.31	0.9	-4	-1	5	8	3	5	8	8	1	6	5	6	5	0	2	4	f	0.24
